# Supplementary material
Source: PubMed Central journal article supplement (PMC2575708)
Supplement: JCI0835834sd.pdf [file JCI0835834sd.pdf]

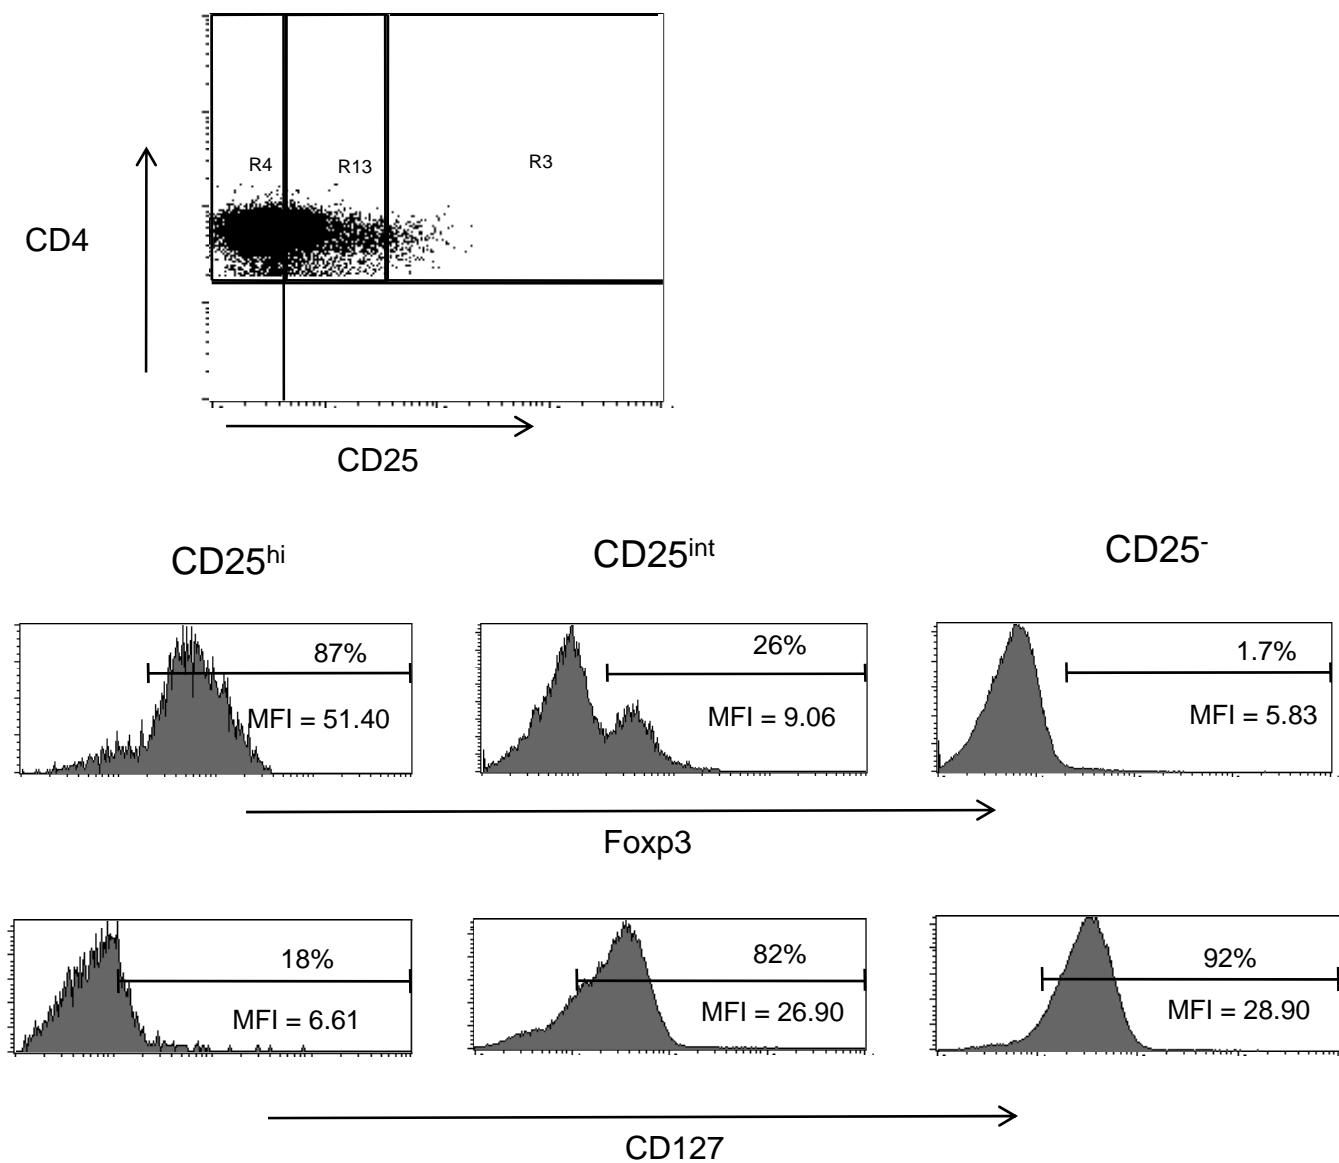

**Suppl. Figure 1. Treg gating and phenotype.** PBMCs were stained with CD4, CD25, CD127 and Foxp3 as described. Subsets are defined by the expression of CD25 as CD25<sup>-</sup>, CD25<sup>int</sup> and CD25<sup>hi</sup>. Expression of Foxp3 and CD127 by each subset is shown in the histograms.

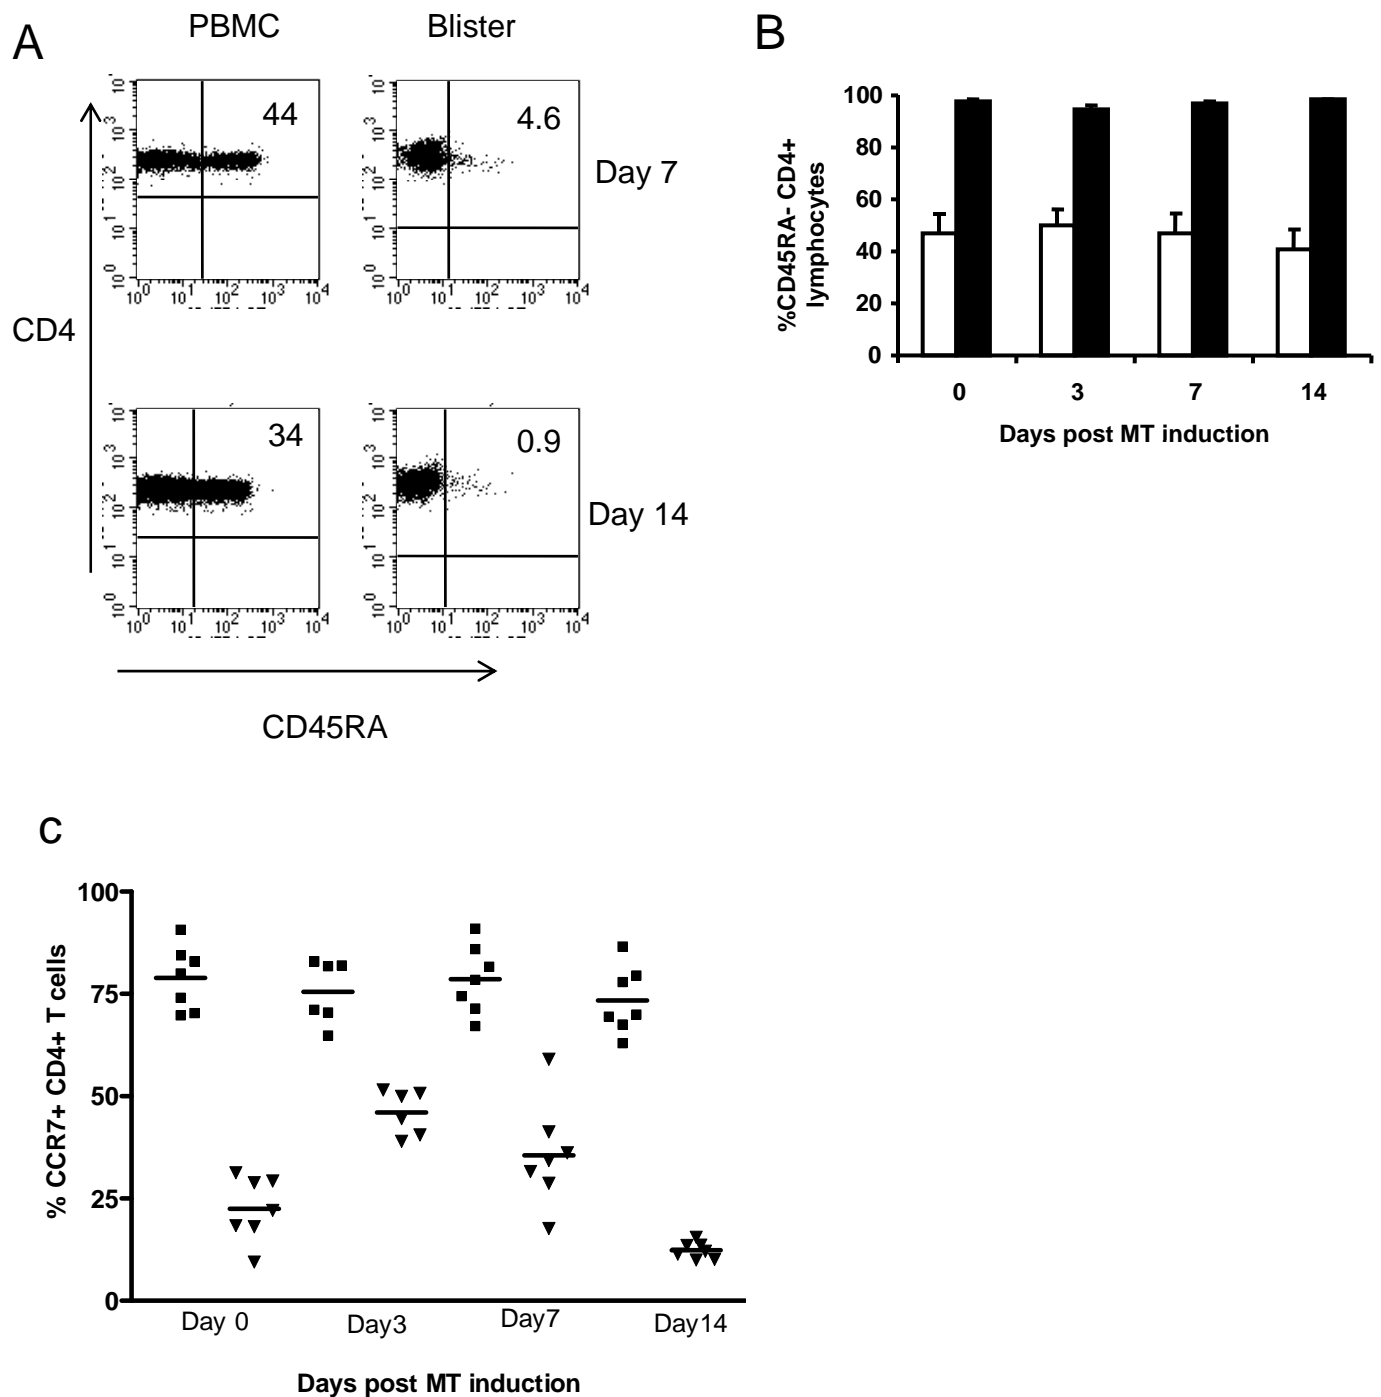

**Suppl. Figure 2. PPD response in the skin is mediated by memory CD4 lymphocytes.**

(A) Left panel shows representative staining with CD4 and CD45RA. (B) The graph shows the proportion of memory (CD45RA<sup>-</sup>) CD4<sup>+</sup> T cells in blood (white bars) and blister cells (black bars) during the course of the MT. (C) Blister cells are predominantly CCR7<sup>-</sup> at all time points and the proportion of cells expressing CCR7 decreases during the MT response (squares-peripheral blood, triangles-blister cells).

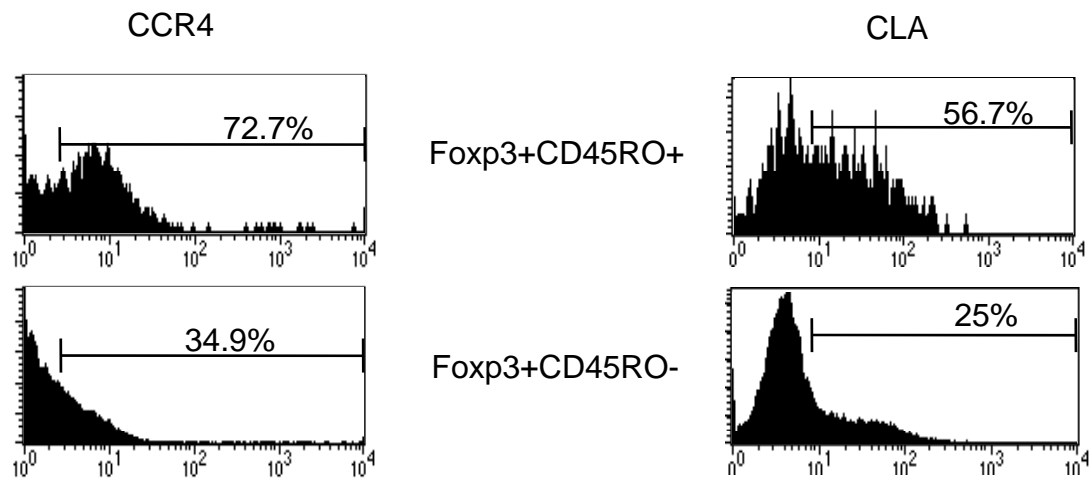

**Suppl. Figure 3. Expression of skin homing receptors on human Foxp3<sup>+</sup> regulatory T cells.**

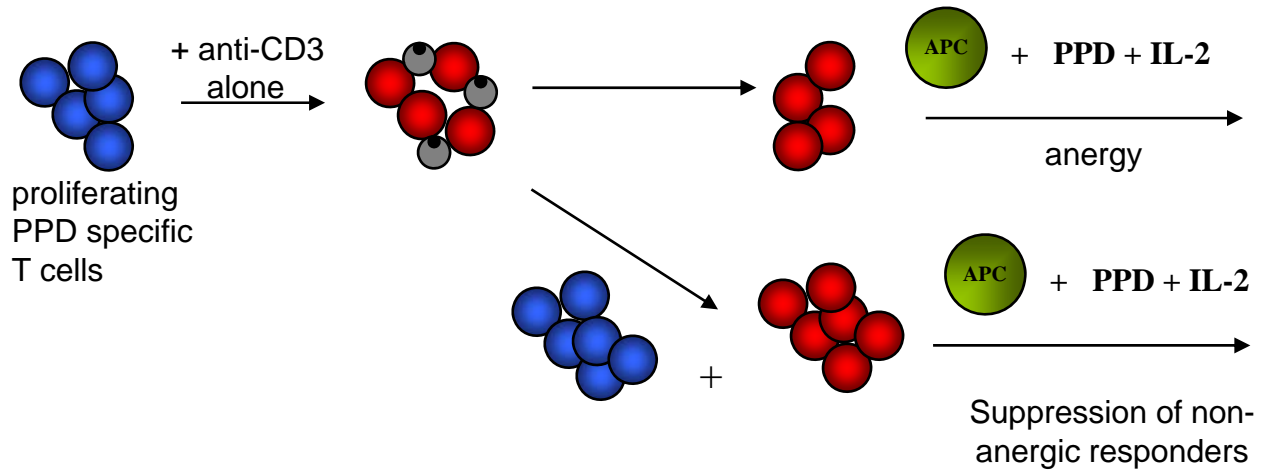

**Suppl. Figure 4. The schematic representation of the induction of anergy.** PPD-specific CD4<sup>+</sup> T cell line was stimulated with a dose range of immobilised anti-CD3 mAb. To test for anergy induction cells are washed and stimulated with PPD and APCs. To test for suppressive function, anergised cells are mixed with responding PPD-specific cells (from the same line) and stimulated with PPD and APC. Proliferation is measured by thymidine incorporation.

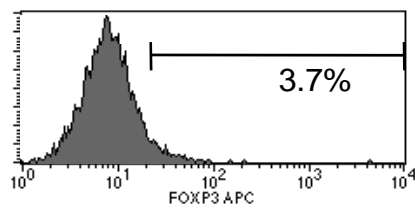

Pre- anergy induction

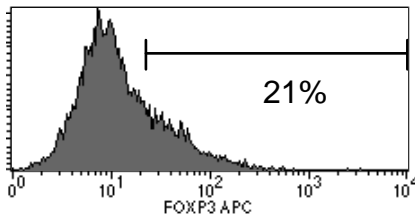

Post-anergy induction

**Suppl. Figure 5. Expression of Foxp3 following anergy induction** PPD-specific CD4<sup>+</sup> T cell line was stimulated with 0.1μg/ml of immobilised anti-CD3 mAb. Following anergy induction, cells were stained with CD4 and Foxp3.
